# Supplementary material for: Nanoscale insights into doping behavior, particle size and surface effects in trivalent metal doped SnO2
Source: PubMed Central journal article supplement (PMC5575111; doi:10.1038/s41598-017-09026-2), 2017-08-29
Supplement: 41598_2017_9026_MOESM1_ESM.pdf [file 41598_2017_9026_MOESM1_ESM.pdf]

## Supplementary Information

### Nanoscale insights into doping behavior, particle size and surface effects in trivalent metal doped SnO<sub>2</sub>

**Bogdan Cojocaru,<sup>a</sup> Daniel Avram<sup>b</sup>, Vadim Kessler<sup>c</sup>, Vasile Parvulescu<sup>a</sup>, Gulaim Seisenbaeva<sup>c</sup>, Carmen Tiseanu<sup>b\*</sup>**

<sup>a</sup> *Department of Chemistry, Univ. Bucuresti, B-dul Regina Elisabeta, nr. 4-12, Sector 3, 030018 Bucharest, Romania*

<sup>b</sup> *National Institute for Laser, Plasma and Radiation Physics, P.O. Box MG-36, RO 76900, Bucharest-Magurele, Romania*

<sup>c</sup> *Department of Molecular Sciences, Biocenter, SLU, Box 7015, SE-75007, Uppsala, Sweden*

*\*Author to whom correspondence should be addressed. Electronic mail: [carmen.tiseanu@inflpr.ro](mailto:carmen.tiseanu@inflpr.ro)*

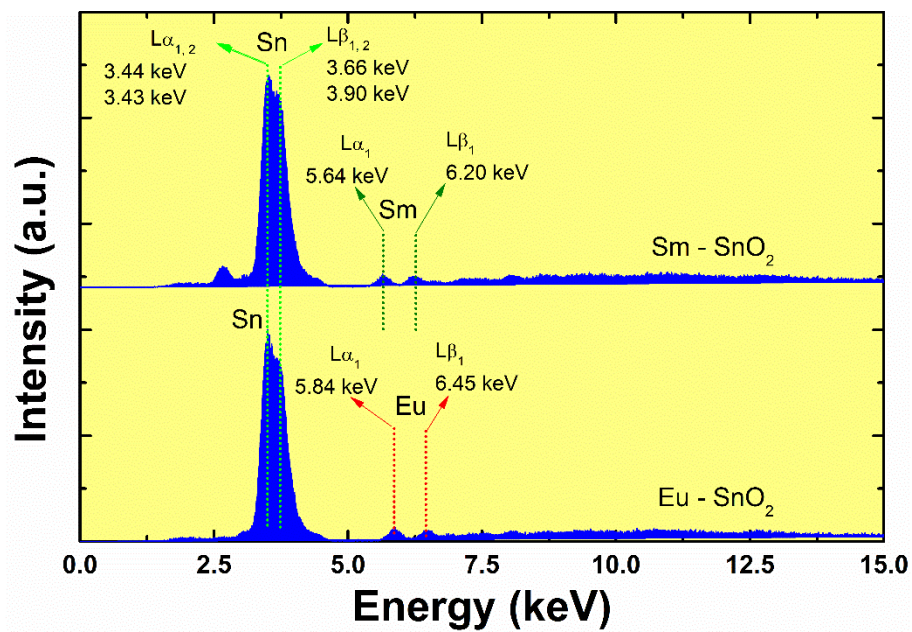

Figure S1. X-ray Fluorescence (XRF) spectra of as-synthesized Eu - SnO<sub>2</sub> and Sm - SnO<sub>2</sub>.

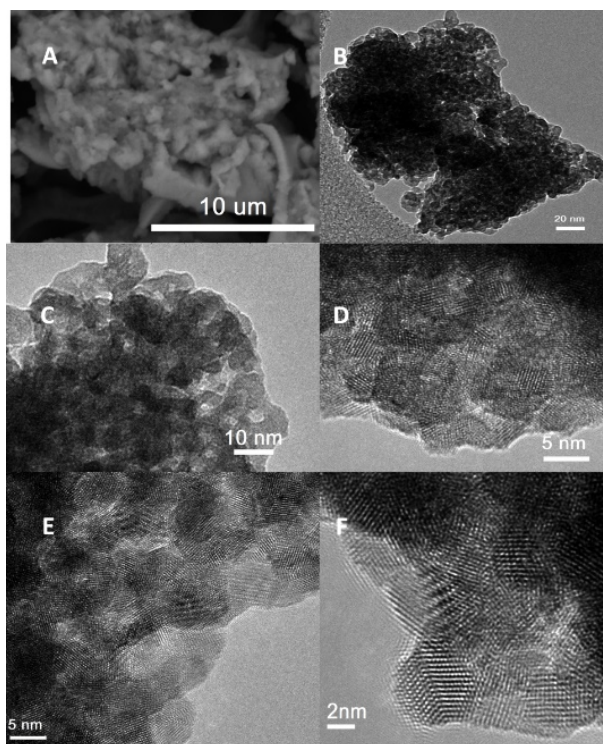

**Figure S2.** SEM view of the as-synthesized SnO<sub>2</sub> particles (A), TEM images of the same material with increasing magnification (B-D), TEM images of the material heat-treated at 400°C (E,F).

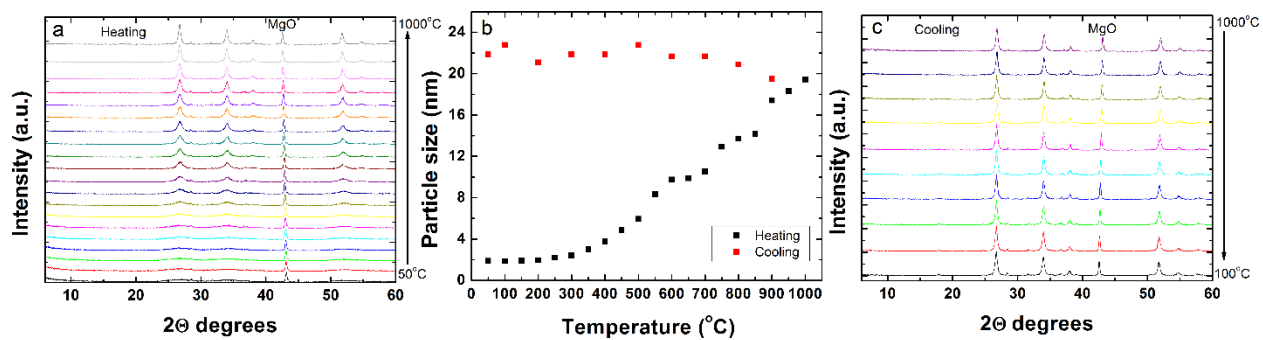

**Figure S3.** In situ XRD patterns (a,b) and variation of the particle size of Eu – SnO<sub>2</sub> during heating and cooling cycles (c).

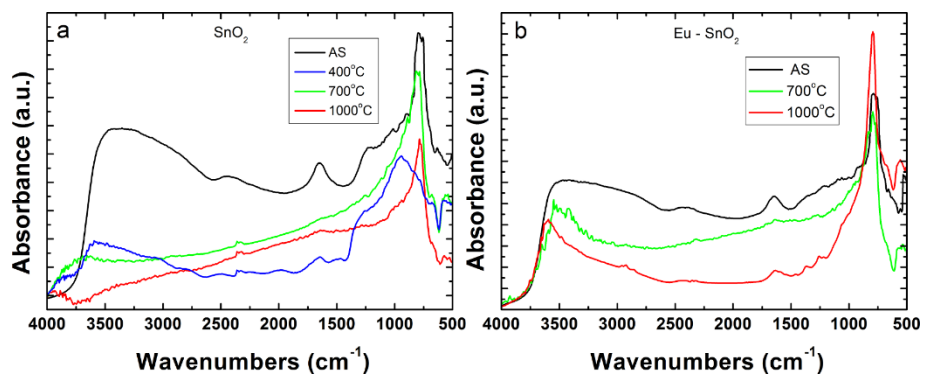

Figure S4. DRIFTS spectra of  $\text{SnO}_2$  (a) and  $\text{Eu-SnO}_2$  (b).

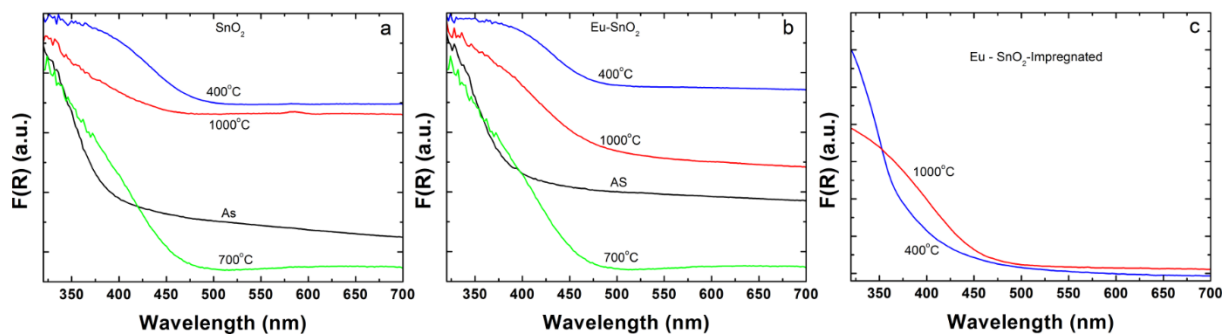

**Figure S5.** DR – UV/Vis spectra of SnO<sub>2</sub> (a), Eu – SnO<sub>2</sub> (b) and impregnated Eu – SnO<sub>2</sub> (c). The decomposition of the precursors by calcination led to the formation of carbonaceous deposits which correspond to a change in color from white to green - grey below 400 °C.

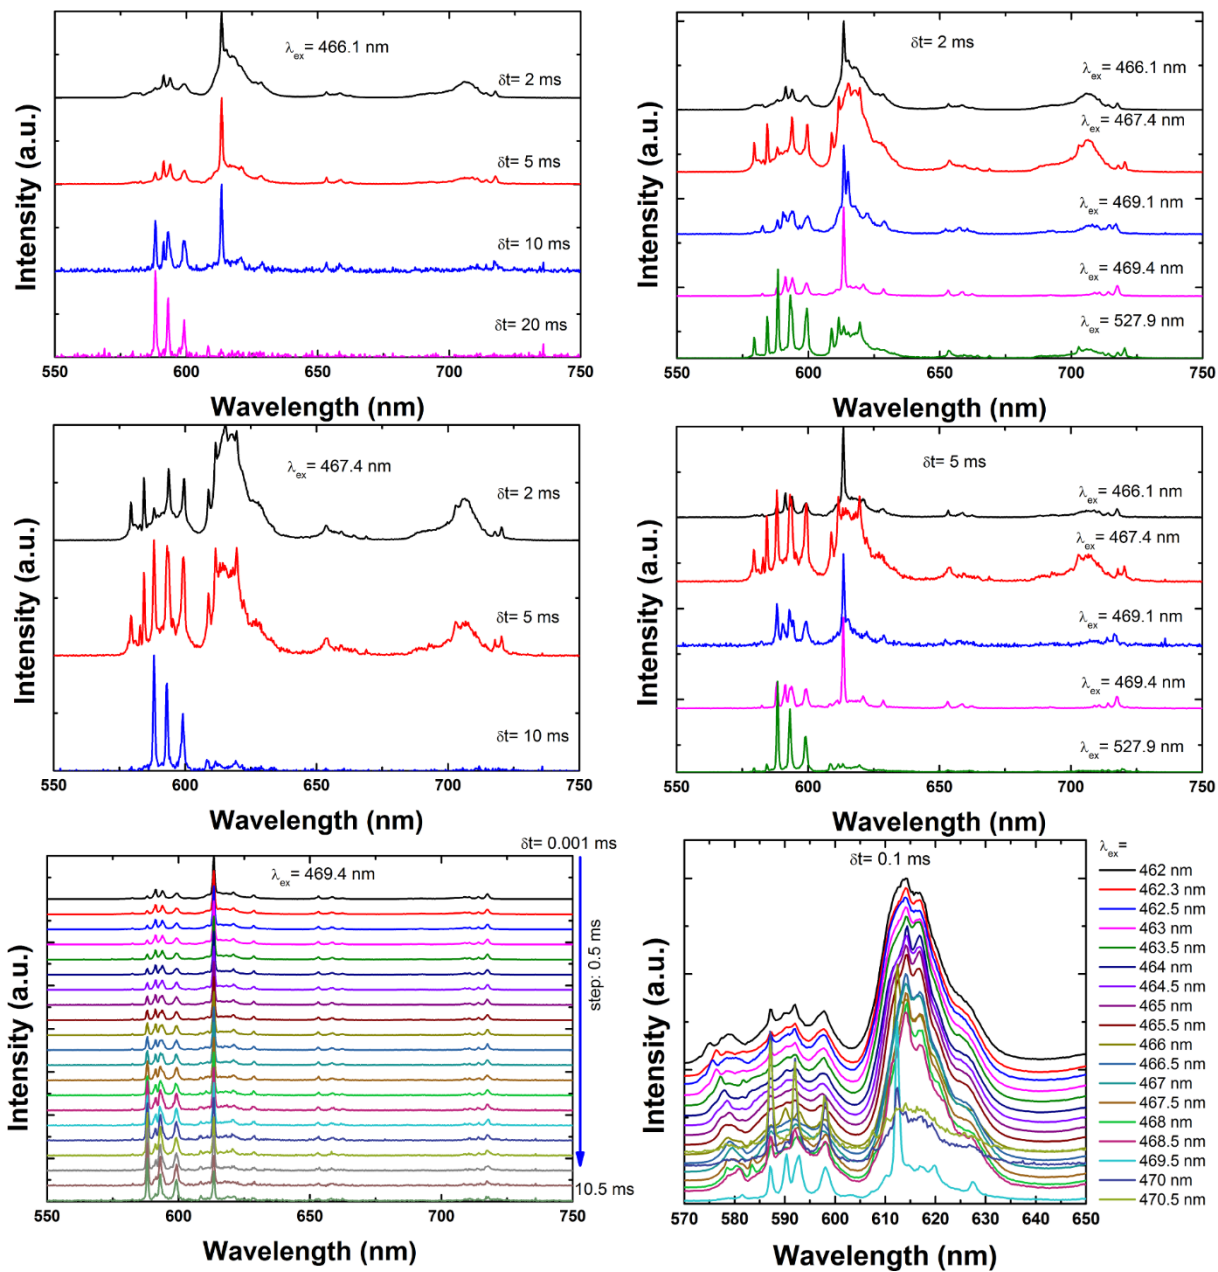

Figure S6. Selected emission spectra used for the spectral separation of the Eu I – V centers illustrated in Figure 5.

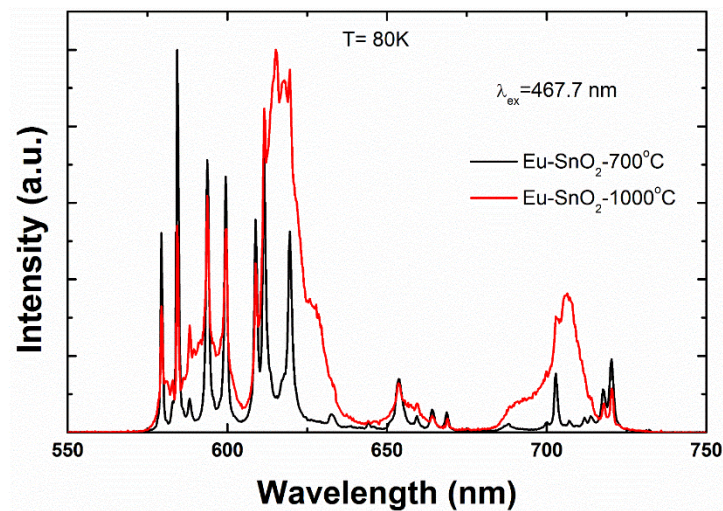

**Figure S7.** Comparison between the emission spectra of Eu – SnO<sub>2</sub> calcined at 700 and 1000 °C showing an enhanced contribution of Eu-surface defect associate (likely OH, see text) in sample calcined 1000 °C.



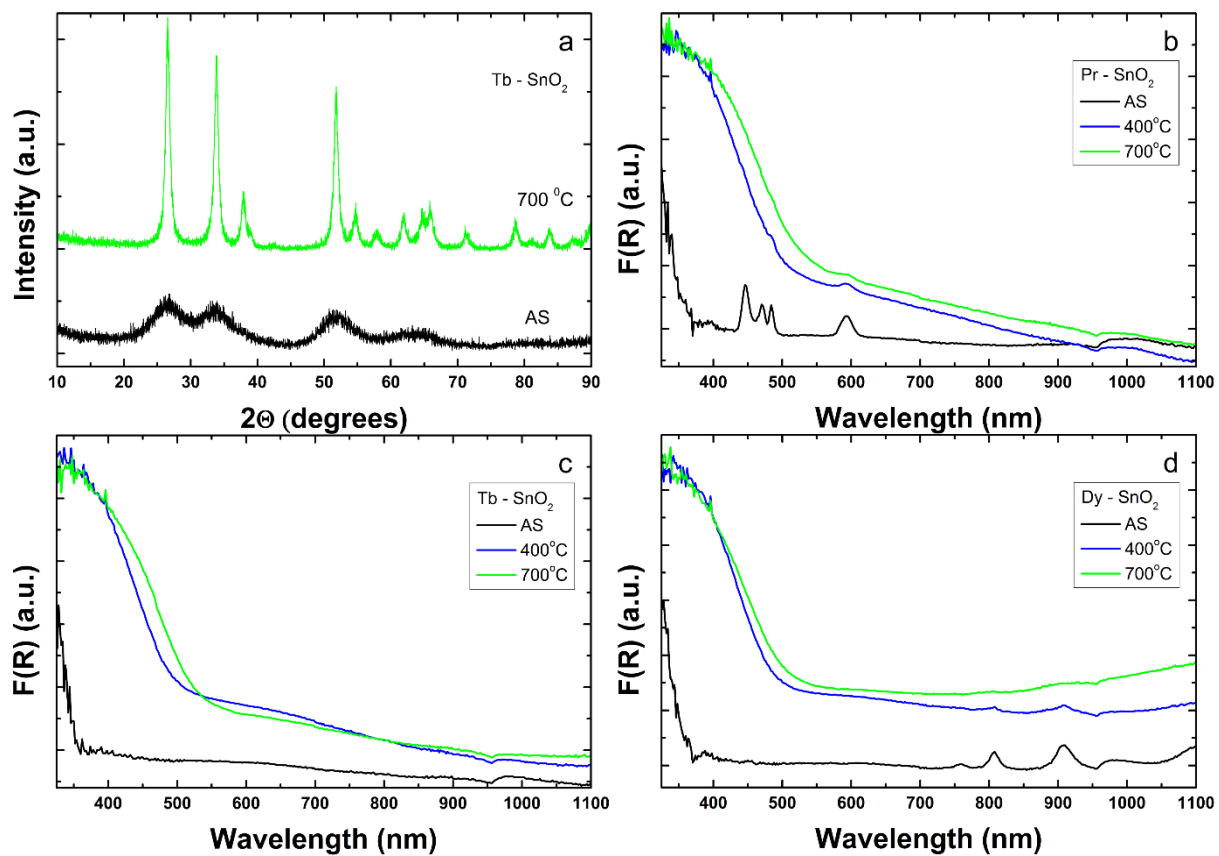

**Figure S8.** Selected XRD patterns (a) and DR-UV/Vis spectra (b) of Pr, Tb and Dy-SnO<sub>2</sub>. f – f absorption transitions can be readily observed for Pr and Dy in the DR-UV/Vis spectra (b, d).

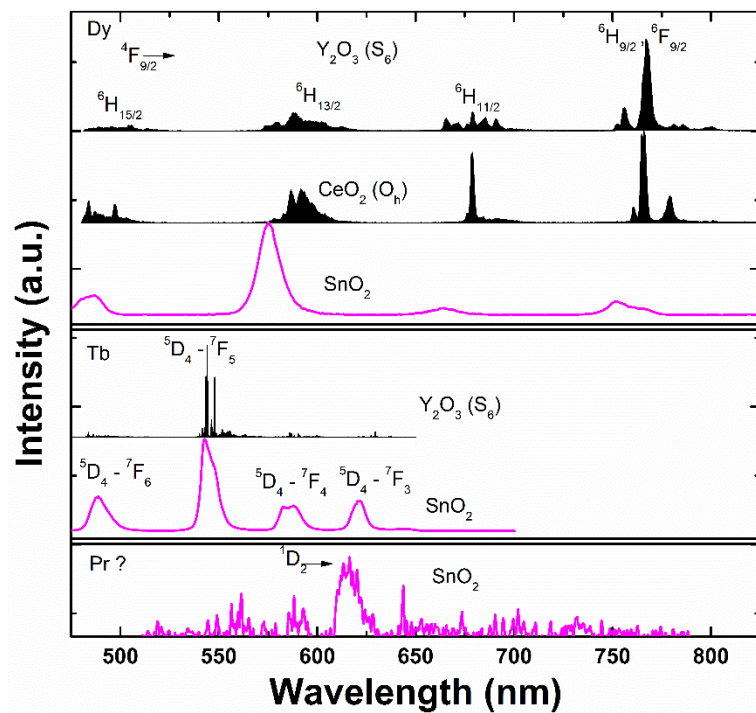

**Figure S9.** Luminescence spectra (c) of Tb and Dy- $\text{SnO}_2$ . For comparison purpose, included are the emission spectra of Dy and Tb in the inversion symmetry sites of  $\text{Y}_2\text{O}_3$ <sup>1</sup> and  $\text{CeO}_2$ <sup>2</sup>.

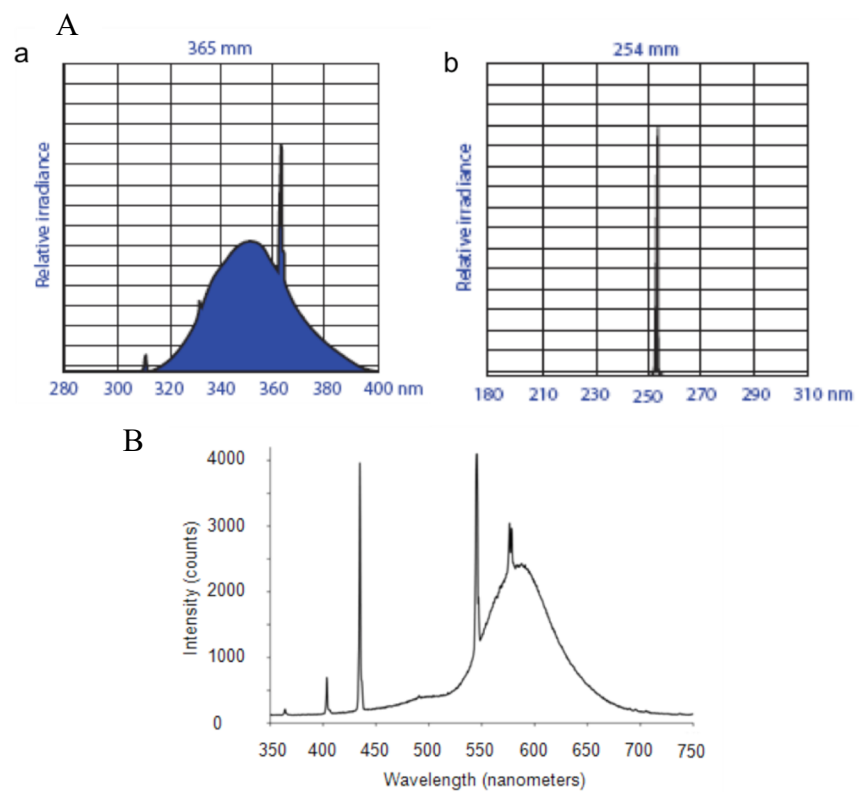

**Figure S10.** The emission spectra of the lamps: A. The UV irradiation is composed of (a) and (b); B. visible light irradiation.

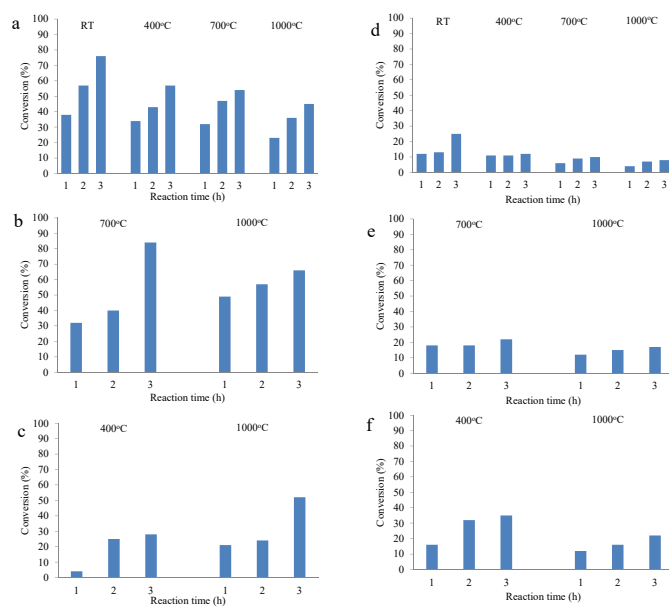

**Figure S11.** Conversion of phenol under UV irradiation using a. SnO<sub>2</sub>, b. D-Eu - SnO<sub>2</sub> and c. I-Eu - SnO<sub>2</sub> and Vis irradiation using d. SnO<sub>2</sub>, e. D-Eu - SnO<sub>2</sub> and f. I-Eu - SnO<sub>2</sub> as function of calcination temperature.

#### References:

- 1 Avram, D., Cojocaru, B., Florea, M. & Tiseanu, C. Advances in luminescence of lanthanide doped Y<sub>2</sub>O<sub>3</sub>: case of S<sub>6</sub> sites. *Optical Materials Express* **6**, 1635-1643, doi:doi:10.1364/OME.6.001635 (2016).
- 2 Avram, D. *et al.* Toward a Unified Description of Luminescence–Local Structure Correlation in Ln Doped CeO<sub>2</sub> Nanoparticles: Roles of Ln Ionic Radius, Ln Concentration, and Oxygen Vacancies. *The Journal of Physical Chemistry C* **119**, 16303-16313, doi:10.1021/acs.jpcc.5b02240 (2015).
